# Supplementary material for: Efficacy and Safety of Ashwagandha Root Extract on Cognitive Functions in Healthy, Stressed Adults: A Randomized, Double-Blind, Placebo-Controlled Study
Source: Evid Based Complement Alternat Med. 2021 Nov 30;2021:8254344. doi: 10.1155/2021/8254344 (PMC8632422; doi:10.1155/2021/8254344)
Supplement: Supplementary Materials — The within- and between-group differences for CANTAB scores from baseline to last visit are shown in the supplementary file. [file 8254344.f1.zip]

Archive with 2 entries (2 files):
- 8254344.f1/CONSORT Checklist.doc
- 8254344.f1/Supplementary file.docx
